# Supplementary material
Source: PubMed Central journal article supplement (PMC3807358)
Supplement: JVI.02128-13_zjv999098197so1.pdf [file JVI.02128-13_zjv999098197so1.pdf]

**Supplemental table 1:**

List of all TaqMan gene expression assays (Applied Biosystems) used to quantify 34 antiviral genes and 6 housekeeping genes.

| Gene Symbol    | Gene name                                                               | Assay ID      |
|----------------|-------------------------------------------------------------------------|---------------|
| APOBEC3A       | apolipoprotein B mRNA editing enzyme, catalytic polypeptide-like 3A     | Hs00377444_m1 |
| APOBEC3B       | apolipoprotein B mRNA editing enzyme, catalytic polypeptide-like 3B     | Hs00358981_m1 |
| APOBEC3C       | apolipoprotein B mRNA editing enzyme, catalytic polypeptide-like 3C     | Hs00828074_m1 |
| APOBEC3D       | apolipoprotein B mRNA editing enzyme, catalytic polypeptide-like 3D     | Hs00537163_m1 |
| APOBEC3F       | apolipoprotein B mRNA editing enzyme, catalytic polypeptide-like 3F     | Hs01665324_m1 |
| APOBEC3G       | apolipoprotein B mRNA editing enzyme, catalytic polypeptide-like 3G     | Hs00222415_m1 |
| APOBEC3H       | apolipoprotein B mRNA editing enzyme, catalytic polypeptide-like 3H     | Hs00419665_m1 |
| TRIM5          | tripartite motif containing 5                                           | Hs01552559_m1 |
| TRIM11         | tripartite motif containing 11                                          | Hs00377007_m1 |
| TRIM14         | tripartite motif containing 14                                          | Hs00207648_m1 |
| TRIM15         | tripartite motif containing 15                                          | Hs00264400_m1 |
| PML/TRIM19     | promyelocytic leukemia                                                  | Hs00971694_m1 |
| TRIM21         | tripartite motif containing 21                                          | Hs00172616_m1 |
| TRIM22         | tripartite motif containing 22                                          | Hs01001179_m1 |
| TRIM26         | tripartite motif containing 26                                          | Hs00758189_m1 |
| TRIM28         | tripartite motif containing 28                                          | Hs00232212_m1 |
| TRIM31         | tripartite motif containing 31                                          | Hs00199794_m1 |
| TRIM32         | tripartite motif containing 32                                          | Hs00705875_s1 |
| BST-2/tetherin | bone marrow stromal cell antigen 2                                      | Hs00171632_m1 |
| ISG15          | ISG15 ubiquitin-like modifier                                           | Hs00192713_m1 |
| HERC5          | hect domain and RLD 5                                                   | Hs00180943_m1 |
| SAMHD1         | SAM domain and HD domain 1                                              | Hs00210019_m1 |
| CDKN1A/p21     | cyclin-dependent kinase inhibitor 1A (p21, Cip1)                        | Hs00355782_m1 |
| SLFN11         | schlafen family member 11                                               | Hs00536981_m1 |
| EIF2AK2/PKR    | eukaryotic translation initiation factor 2-alpha kinase 2               | Hs00169345_m1 |
| PAF1           | Paf1, RNA polymerase II associated factor, homolog (S. cerevisiae)      | Hs00219496_m1 |
| RTF1           | Rtf1, Paf1/RNA polymerase II complex component, homolog (S. cerevisiae) | Hs00385532_m1 |
| IFITM1         | interferon induced transmembrane protein 1 (9-27)                       | Hs00705137_s1 |
| IFITM2         | interferon induced transmembrane protein 2 (1-8D)                       | Hs00829485_sH |
| IFITM3         | interferon induced transmembrane protein 3                              | Hs03057129_s1 |
| RSAD2/viperin  | radical S-adenosyl methionine domain containing 2                       | Hs00369813_m1 |
| MOV10          | Mov10, Moloney leukemia virus 10, homolog (mouse)                       | Hs00253093_m1 |
| CTR9           | Ctr9, Paf1/RNA polymerase II complex component, homolog (S. cerevisiae) | Hs00206060_m1 |
| RNASEL         | ribonuclease L (2,5-oligoadenylate synthetase-dependent)                | Hs00221692_m1 |
| UBC            | ubiquitin C                                                             | Hs00824723_m1 |
| RPLP0          | ribosomal protein, large, P0                                            | Hs99999902_m1 |
| PPIA           | peptidylprolyl isomerase A (cyclophilin A)                              | Hs99999904_m1 |
| ACTB           | actin, beta                                                             | Hs99999903_m1 |
| 18S            | Eukaryotic 18S rRNA                                                     | Hs99999901_s1 |
| GAPDH          | glyceraldehyde-3-phosphate dehydrogenase                                | Hs99999905_m1 |
